# Supplementary material for: Maintaining Policy Support for Contested Health Reforms: The Role of Trust, Emotion, and Procedural Legitimacy
Source: Research Square preprint supplement (doi:10.21203/rs.3.rs-6844611/v1), 2025-10-08
Supplement: Supplementary file 1 [file 194886745aaa9b9db884c402.docx]

**Table S1. Robustness Checks Using Alternative Measures of Trust in Government in the Moderated Mediation Model**

1. Belief that Government Prioritizes Public Health

| Outcome Variable | Moderator | Effect  Type | Predictor | B | 95% CI |
| --- | --- | --- | --- | --- | --- |
| Policy agreement  with increasing  the number of doctors | Negative  emotion | Indirect | Trust in government → Perceived physician supply | 0.045 | 0.007 to 0.083 |
| Indirect | Perceived physician supply | 0.394 | 0.259 to 0.529 |
| Direct | Trust in government | 0.275 | 0.213 to 0.336 |
| Moderator | Perceived physician supply  × Negative emotion | 0.279 | 0.088 to 0.470 |
| Procedural justice | Indirect | Trust in government → Perceived physician supply | 0.045 | 0.007 to 0.083 |
| Indirect | Perceived physician supply | 0.900 | 0.596 to 1.204 |
| Direct | Trust in government | 0.179 | 0.115 to 0.242 |
| Moderator | Perceived physician supply  × Procedural justice | -0.180 | -0.314 to -0.046 |
| Policy agreement  on healthcare reform | Negative  emotion | Indirect | Trust in government → Perceived need for reform | 0.251 | 0.001 to 0.500 |
| Indirect | Perceived need for reform | 0.351 | 0.269 to 0.433 |
| Direct | Trust in government | 0.661 | 0.479 to 0.843 |
| Moderator | Perceived need for reform × Negative emotion | -0.093 | -0.204 to 0.018 |
| Procedural justice | Indirect | Trust in government → Perceived need for reform | 0.251 | 0.001 to 0.500 |
| Indirect | Perceived need for reform | 0.241 | 0.066 to 0.416 |
| Direct | Trust in government | 0.496 | 0.298 to 0.694 |
| Moderator | Perceived need for reform × Procedural justice | 0.024 | -0.061 to 0.109 |

1. Institutional trust

| Outcome Variable | Moderator | Effect  Type | Predictor | B | 95% CI |
| --- | --- | --- | --- | --- | --- |
| Policy agreement  with increasing  the number of doctors | Negative  emotion | Indirect | Trust in government → Perceived physician supply | 0.013 | -0.003 to 0.030 |
| Indirect | Perceived physician supply | 0.414 | 0.274 to 0.554 |
| Direct | Trust in government | 0.115 | 0.089 to 0.141 |
| Moderator | Perceived physician supply  × Negative emotion | 0.265 | 0.073 to 0.457 |
| Procedural justice | Indirect | Trust in government → Perceived physician supply | 0.013 | -0.004 to 0.030 |
| Indirect | Perceived physician supply | 0.892 | 0.592 to 1.192 |
| Direct | Trust in government | 0.065 | 0.038 to 0.093 |
| Moderator | Perceived physician supply  × Procedural justice | -0.171 | -0.304 to -0.038 |
| Policy agreement  on healthcare reform | Negative  emotion | Indirect | Trust in government → Perceived need for reform | 0.052 | -0.060 to 0.164 |
| Indirect | Perceived need for reform | 0.366 | 0.282 to 0.450 |
| Direct | Trust in government | 0.288 | 0.209 to 0.367 |
| Moderator | Perceived need for reform × Negative emotion | -0.103 | -0.216 to 0.009 |
| Procedural justice | Indirect | Trust in government → Perceived need for reform | 0.013 | -0.004 to 0.030 |
| Indirect | Perceived need for reform | 0.892 | 0.592 to 1.192 |
| Direct | Trust in government | 0.065 | 0.038 to 0.093 |
| Moderator | Perceived need for reform × Procedural justice | -0.171 | -0.304 to -0.038 |

**Table S2. Conditional Indirect (Bootstrapped, 1,000 reps)**

1. **Effects for increasing physician supply policy support**

| Moderator Level (Negative Emotion) | Indirect Effect | 95% CI |
| --- | --- | --- |
| 0 (No negative emotion) | 0.005 | 0.002 to 0.008 |
| 1 (Negative emotion present) | 0.009 | 0.005 to 0.013 |
| Direct effect | 0.066 | 0.056 to 0.076 |

Note: Indirect effect refers to the path Belief → Perceived physician supply → Policy agreement on physician expansion

All models were adjusted for sex, age, income, education, and political orientation

1. **Effects for healthcare reform agreement**

| Moderator Level (Negative Emotion) | Indirect Effect | 95% CI |
| --- | --- | --- |
| 0 (No negative emotion) | 0.021 | 0.005 to 0.037 |
| 1 (Negative emotion present) | 0.015 | 0.003 to 0.027 |
| Direct effect | 0.146 | 0.116 to 0.176 |

Note: Indirect effect refers to the path Belief → Perceived reform need → Policy agreement on healthcare reform

All models were adjusted for sex, age, income, education, and political orientationn
