# Supplementary material for: Maintaining Policy Support for Contested Health Reforms: The Role of Trust, Emotion, and Procedural Legitimacy
Source: Research Square preprint supplement (doi:10.21203/rs.3.rs-6844611/v1), 2025-10-08
Supplement: Supplementary file 2 [file d1bed9516e47d4f6a3c4ef85.docx]

**1. Independent variable: Trust in government leading the healthcare reform**

**Q. Please select the option that most closely aligns with your beliefs regarding each of the following statements.**

|  | **Not at all** | **Hardly** | **Neutral** | **Somewhat agree** | **Very much agree** |
| --- | --- | --- | --- | --- | --- |
| **1** | **2** | **3** | **4** | **5** |
| 1) The government knows what needs to be done for healthcare reform. |  |  |  |  |  |
| 2) The government pursues healthcare reform policies for my health and the health of the public. |  |  |  |  |  |
| 3) The government has an accurate understanding of the issues with the current healthcare system. |  |  |  |  |  |
| 4) The government implements healthcare reform policies consistently. |  |  |  |  |  |
| 5) The government selects appropriate policy measures for healthcare reform. |  |  |  |  |  |
| 6) The government provides reliable information and explanations regarding healthcare reform policies. |  |  |  |  |  |
| 7) If the government's policies are implemented as planned, the intended healthcare reform goals will be achieved. |  |  |  |  |  |

**2. Mediator: Problem Perception**

**2-1. Physician supply**

**Q. What have you generally thought about the number of doctors in our country?**

1) I have thought that there are too few doctors -> Proceed to 6-1

2) I have thought that the number of doctors is adequate

3) I have thought that the number of doctors exceeds the appropriate level

4) I have not thought deeply about this issue / I have no particular opinion

**2-2. Perceived Needs (Need for healthcare reform)**

**Q. How necessary do you think reforms are for the following subsystems to
enhance the sustainability of our country's healthcare system?**Please select the option that best reflects your usual opinion.

|  | **Very low need for reform** | **Low need for reform** | **Neither low nor high need for reform** | **High need for reform** | **Very high need for reform** | **Don’t know / Never thought about it** |
| --- | --- | --- | --- | --- | --- | --- |
| 1) Development of medical personnel (e.g., training of doctors, expansion of essential healthcare workforce) |  |  |  |  |  |  |
| 2) Allocation of medical resources (e.g., regional doctor placement, designation of regional emergency medical centers) |  |  |  |  |  |  |
| 3) Delivery of medical services (e.g., defining the roles of primary, secondary, and tertiary healthcare institutions) |  |  |  |  |  |  |
| 4) Payment and reimbursement for medical services (e.g., medical fees, compensation for healthcare institutions) |  |  |  |  |  |  |
| 5) Healthcare financing (e.g., securing funds, managing appropriate medical costs) |  |  |  |  |  |  |
|
| 6) Healthcare system management (e.g., decision-making in health policies, regulations, leadership) |  |  |  |  |  |  |

**3. Moderator**

**3-1. Negative emotional triggered by the prolonged government-physician conflict**

**Q. What emotions have you felt regarding the policy conflict between the government and medical organizations over healthcare reform/doctor expansion?**

1) Negative emotions (Q-1)

2) Positive emotions (Q-2)

3) I have felt neither positive nor negative emotions.

**Q-1. If you felt negative emotions, what specific emotion did you feel most strongly?**

1) Anger/annoyance/indignation

2) Sadness/despair/helplessness

3) Anxiety/nervousness/fear

4) Disappointment/frustration/discouragement

5) Shame/embarrassment/discomfiture

6) Disgust/hatred

7) Heartache/anguish

8) None of the above: ___________

**Q-2. If you felt positive emotions, what specific emotion did you feel most strongly?**

1) Joy/happiness

2) Hope/expectation

3) Pride/sense of accomplishment

4) Relief/contentment

5) Satisfaction/elation

6) Gratitude/appreciation

7) Awe/respect

8) None of the above: ___________

**3-2. Fairness and transparency in how the reform was introduced**

| **Please read the following description carefully before answering the questions below.**  **※ Explanation: In February 2024, the government presented four major healthcare reform objectives: 1) expansion of medical personnel, 2) strengthening of regional healthcare, 3) establishment of a safety net for medical accidents, and 4) fair compensation. To achieve these goals, the government announced a healthcare reform package. This package addresses essential healthcare compensation enhancement, normalization of the delivery system, national responsibility for resident training, a safety net for medical accidents, and improvements in transparency, independence, expertise, and mutual cooperation.** |
| --- |

**Q. How procedurally fair do you think the government’s actions were after the announcement of healthcare reform policies?**

1) Not at all fair

2) Partially fair

3) Completely fair

99) Don’t know / Have not thought about it

**4. Dependent variable: Policy Support**

**Q. How much do you agree with each of the healthcare reform objectives proposed by the government?**

|  | **Strongly disagree** | **Disagree** | **Neither agree nor disagree** | **Agree** | **Strongly agree** |
| --- | --- | --- | --- | --- | --- |
| **1** | **2** | **3** | **4** | **5** |
| 1) Expansion of medical personnel (e.g., increasing medical school admission quotas, specialist-centered hospitals) |  |  |  |  |  |
| 2) Strengthening regional healthcare (e.g., defining the roles of healthcare institutions by type, increasing investment in regional healthcare) |  |  |  |  |  |
| 3) Establishing a safety net for medical accidents (e.g., establishing a system to protect the rights of victims, reducing the burden of criminal liability on medical professionals) |  |  |  |  |  |
| 4) Enhancing fairness in the compensation system (e.g., significant increases in compensation for essential medical services, establishing a management system for non-covered services) |  |  |  |  |  |
